# Supplementary material for: Induced Pluripotent Stem Cells Show Metabolomic Differences to Embryonic Stem Cells in Polyunsaturated Phosphatidylcholines and Primary Metabolism
Source: PubMed Central journal article supplement (PMC3471894; doi:10.1371/journal.pone.0046770), 2012-10-15

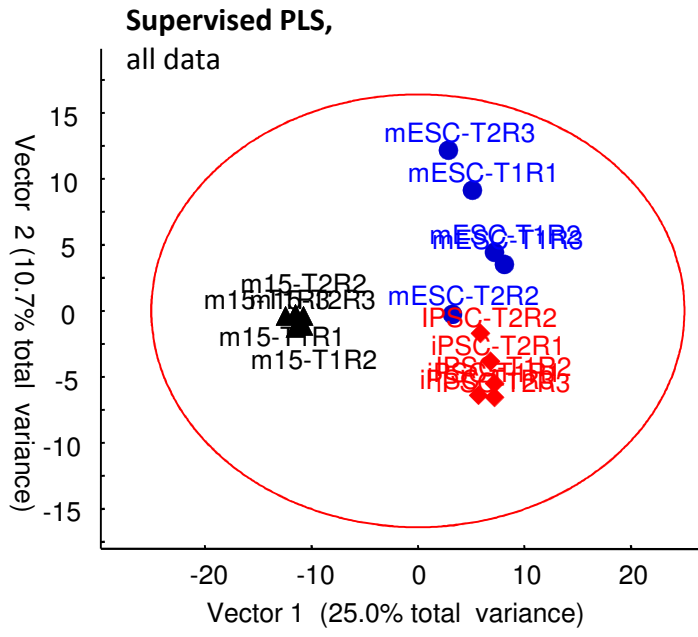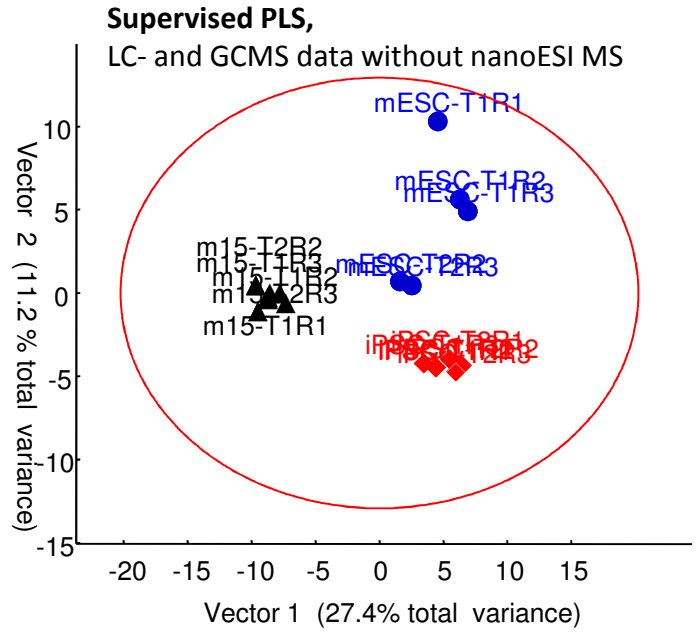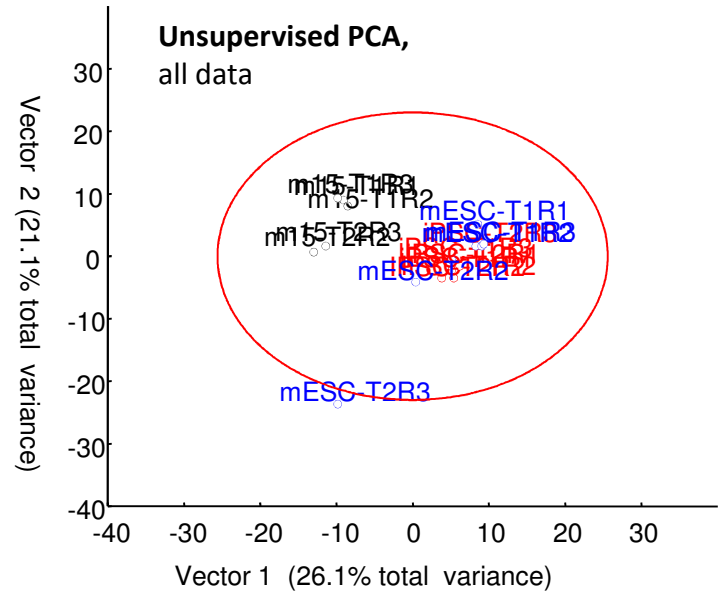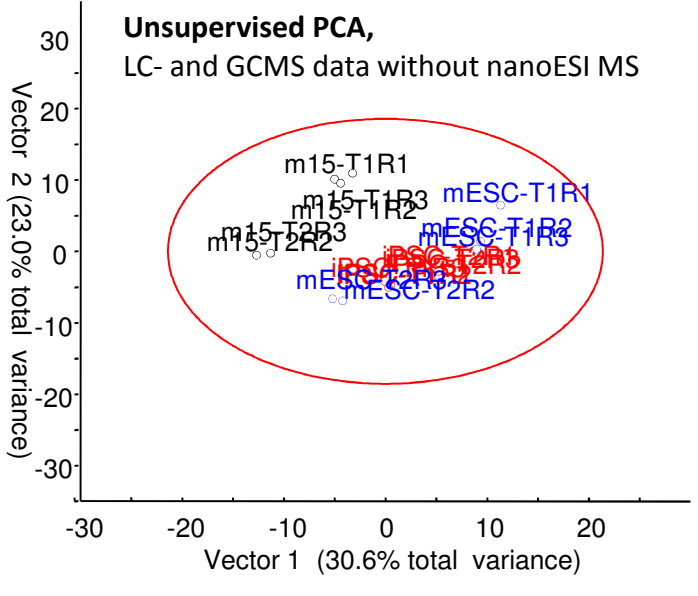

Supplement: pone.0046770.s001.pdf [file pone.0046770.s001.pdf]
