# Supplementary material for: Induced Pluripotent Stem Cells Show Metabolomic Differences to Embryonic Stem Cells in Polyunsaturated Phosphatidylcholines and Primary Metabolism
Source: PubMed Central journal article supplement (PMC3471894; doi:10.1371/journal.pone.0046770), 2012-10-15
Supplement: pone.0046770.s003.pdf [file pone.0046770.s003.pdf]

| <b>Acylcarnitines</b>          | <b>Phosphatidylcholines</b>         | <b>Phosphatidylethanolamines</b>         |
|--------------------------------|-------------------------------------|------------------------------------------|
| Acylcarnitine C12:0            | Lysophosphatidylcholine C9:0        | Lysophosphatidylethanolamine C16:0       |
| Acylcarnitine C12:1            | Lysophosphatidylcholine C10:0       | Plasmenyl-Phosphatidylethanolamine C34:0 |
| Acylcarnitine C16:0            | Lysophosphatidylcholine C16:0       | Plasmenyl-Phosphatidylethanolamine C34:1 |
| Acylcarnitine C18:0            | Lysophosphatidylcholine C18:1       | Plasmenyl-Phosphatidylethanolamine C36:0 |
| Acylcarnitine C18:1            | Lysophosphatidylcholine C18:2       | Plasmenyl-Phosphatidylethanolamine C36:1 |
| Acylcarnitine C18:3            | Plasmenyl-Phosphatidylcholine C30:1 | Plasmenyl-Phosphatidylethanolamine C36:3 |
| Acylcarnitine C20:2            | Plasmenyl-Phosphatidylcholine C31:0 | Plasmenyl-Phosphatidylethanolamine C36:4 |
| Acylcarnitine C24:1            | Plasmenyl-Phosphatidylcholine C31:1 | Plasmenyl-Phosphatidylethanolamine C36:5 |
| <b>Diacylglycerols</b>         | Plasmenyl-Phosphatidylcholine C32:0 | Plasmenyl-Phosphatidylethanolamine C38:0 |
| Diacylglycerol C24:1           | Plasmenyl-Phosphatidylcholine C33:0 | Plasmenyl-Phosphatidylethanolamine C38:4 |
| Diacylglycerol C39:2           | Phosphatidylcholine C9:0            | Plasmenyl-Phosphatidylethanolamine C38:5 |
| Diacylglycerol C41:2           | Phosphatidylcholine C15:0           | Plasmenyl-Phosphatidylethanolamine C38:6 |
| Diacylglycerol C43:4           | Phosphatidylcholine C22:2           | Plasmenyl-Phosphatidylethanolamine C40:0 |
| Diacylglycerol C47:0           | Phosphatidylcholine C26:0           | Plasmenyl-Phosphatidylethanolamine C40:6 |
| Diacylglycerol C48:0           | Phosphatidylcholine C27:0           | Phosphatidylethanolamine C12:0           |
| Diacylglycerol C50:0           | Phosphatidylcholine C28:1           | Phosphatidylethanolamine C19:1           |
| <b>Diacylglycerophosphates</b> | Phosphatidylcholine C29:2           | Phosphatidylethanolamine C33:0           |
| Diacylglycerophosphate C12:0   | Phosphatidylcholine C30:0           | Phosphatidylethanolamine C33:1           |
| Diacylglycerophosphate C20:3   | Phosphatidylcholine C30:1           | Phosphatidylethanolamine C34:1           |
| Diacylglycerophosphate C33:1   | Phosphatidylcholine C31:0           | Phosphatidylethanolamine C35:1           |
| Diacylglycerophosphate C34:0   | Phosphatidylcholine C31:3           | Phosphatidylethanolamine C35:5           |
| Diacylglycerophosphate C36:0   | Phosphatidylcholine C31:5           | Phosphatidylethanolamine C35:6           |
| Diacylglycerophosphate C36:1   | Phosphatidylcholine C31:6           | Phosphatidylethanolamine C36:1           |
| Diacylglycerophosphate C38:0   | Phosphatidylcholine C32:0           | Phosphatidylethanolamine C36:2           |
| Diacylglycerophosphate C39:2   | Phosphatidylcholine C32:1           | Phosphatidylethanolamine C36:4           |
| Diacylglycerophosphate C45:0   | Phosphatidylcholine C32:2           | Phosphatidylethanolamine C37:0           |
| Diacylglycerophosphate C8:0    | Phosphatidylcholine C32:5           | Phosphatidylethanolamine C37:5           |
| <b>Phosphatidylserines</b>     | Phosphatidylcholine C33:0           | Phosphatidylethanolamine C37:6           |
| Phosphatidylserine C36:4       | Phosphatidylcholine C33:2           | Phosphatidylethanolamine C37:7           |
| Phosphatidylserine C41:0       | Phosphatidylcholine C34:0           | Phosphatidylethanolamine C38:2           |
| <b>Sphingomyelins</b>          | Phosphatidylcholine C34:1           | Phosphatidylethanolamine C38:4           |
| Sphingomyelin C21:0            | Phosphatidylcholine C34:2           | Phosphatidylethanolamine C38:6           |
| Sphingomyelin C31:0            | Phosphatidylcholine C34:3           | Phosphatidylethanolamine C38:7           |
| Sphingomyelin C32:0            | Phosphatidylcholine C35:1           | Phosphatidylethanolamine C39:1           |
| Sphingomyelin C33:1            | Phosphatidylcholine C36:1           | Phosphatidylethanolamine C39:3           |
| Sphingomyelin C34:0            | Phosphatidylcholine C36:2           | Phosphatidylethanolamine C39:6           |
| Sphingomyelin C34:1            | Phosphatidylcholine C36:3           | Phosphatidylethanolamine C39:7           |
| Sphingomyelin C34:2            | Phosphatidylcholine C36:4           | Phosphatidylethanolamine C40:6           |
| Sphingomyelin C35:1            | Phosphatidylcholine C36:6           | Phosphatidylethanolamine C40:7           |
| Sphingomyelin C36:0            | Phosphatidylcholine C37:0           |                                          |
| Sphingomyelin C38:0            | Phosphatidylcholine C37:4           |                                          |
| Sphingomyelin C38:1            | Phosphatidylcholine C37:5           |                                          |
| Sphingomyelin C38:4            | Phosphatidylcholine C37:7           |                                          |
| Sphingomyelin C38:5            | Phosphatidylcholine C38:0           |                                          |
| Sphingomyelin C39:0            | Phosphatidylcholine C38:1           |                                          |
| Sphingomyelin C39:4            | Phosphatidylcholine C38:2           |                                          |
| Sphingomyelin C39:5            | Phosphatidylcholine C38:3           |                                          |
| Sphingomyelin C40:0            | Phosphatidylcholine C38:4           |                                          |
| Sphingomyelin C40:1            | Phosphatidylcholine C38:6           |                                          |

|                         |                           |  |
|-------------------------|---------------------------|--|
| Sphingomyelin C40:2     | Phosphatidylcholine C39:0 |  |
| Sphingomyelin C41:4     | Phosphatidylcholine C39:4 |  |
| Sphingomyelin C41:5     | Phosphatidylcholine C39:7 |  |
| Sphingomyelin C42:0     | Phosphatidylcholine C40:0 |  |
| Sphingomyelin C42:2     | Phosphatidylcholine C40:1 |  |
| <b>Triacylglycerols</b> | Phosphatidylcholine C40:2 |  |
| Triacylglycerol C54:3   | Phosphatidylcholine C40:3 |  |
| Triacylglycerol C59:0   | Phosphatidylcholine C40:4 |  |
| Triacylglycerol C61:5   | Phosphatidylcholine C40:6 |  |
| Triacylglycerol C62:0   | Phosphatidylcholine C40:7 |  |
| Triacylglycerol C62:1   | Phosphatidylcholine C41:0 |  |
|                         | Phosphatidylcholine C41:4 |  |
|                         | Phosphatidylcholine C44:4 |  |
|                         | Phosphatidylcholine C48:4 |  |
