# Supplementary material for: Induced Pluripotent Stem Cells Show Metabolomic Differences to Embryonic Stem Cells in Polyunsaturated Phosphatidylcholines and Primary Metabolism
Source: PubMed Central journal article supplement (PMC3471894; doi:10.1371/journal.pone.0046770), 2012-10-15
Supplement: pone.0046770.s004.pdf [file pone.0046770.s004.pdf]

| Name                     | PubChem Number | Method | Database | m15 - Average Normalized Intensity (±SD) | iPSC - Average Normalized Intensity (±SD) | mESC - Average Normalized Intensity (±SD) | iPSC/m15 |             | mESC/m15 |             | mESC/iPSC |             |
|--------------------------|----------------|--------|----------|------------------------------------------|-------------------------------------------|-------------------------------------------|----------|-------------|----------|-------------|-----------|-------------|
|                          |                |        |          |                                          |                                           |                                           | p        | Fold Change | p        | Fold Change | p         | Fold Change |
| 1-monostearin            | 24699          | GCTOF  | BinBase  | 330±285                                  | 261±235                                   | 318±159                                   | 0.6719   | 0.79        | 0.9354   | 0.96        | 0.6604    | 1.22        |
| 3-phosphoglycerate       | 724            | GCTOF  | BinBase  | 1341±175                                 | 1736±1178                                 | 3601±2621                                 | 0.4800   | 1.29        | 0.0906   | 2.68        | 0.1497    | 2.07        |
| 5'-Methylthioadenosine   | 439176         | GCTOF  | BinBase  | 599±253                                  | 419±110                                   | 732±305                                   | 0.1469   | 0.70        | 0.4758   | 1.22        | 0.0429    | 1.75        |
| 5-methoxytryptamine      | 1833           | GCTOF  | BinBase  | 1121±916                                 | 673±193                                   | 991±242                                   | 0.2689   | 0.60        | 0.7682   | 0.88        | 0.0379    | 1.47        |
| Adenosine                | 60961          | GCTOF  | BinBase  | 382±216                                  | 351±160                                   | 547±558                                   | 0.7888   | 0.92        | 0.5543   | 1.43        | 0.4280    | 1.56        |
| adenosine-5-phosphate    | 6083           | GCTOF  | BinBase  | 16113±7075                               | 6348±460                                  | 8496±1791                                 | 0.0078   | 0.39        | 0.0479   | 0.53        | 0.0189    | 1.34        |
| adipic acid              | 196            | GCTOF  | BinBase  | 373±163                                  | 609±227                                   | 547±243                                   | 0.0845   | 1.63        | 0.2205   | 1.47        | 0.6715    | 0.90        |
| Alanine                  | 5950           | GCTOF  | BinBase  | 165545±14756                             | 37578±9669                                | 52442±30178                               | 0.0000   | 0.23        | 0.0001   | 0.32        | 0.2803    | 1.40        |
| aminomalonic acid        | 100714         | GCTOF  | BinBase  | 2675±2353                                | 592±392                                   | 1122±1209                                 | 0.0595   | 0.22        | 0.2256   | 0.42        | 0.3345    | 1.89        |
| arachidic acid           | 10467          | GCTOF  | BinBase  | 1461±378                                 | 1950±1089                                 | 2432±1682                                 | 0.3671   | 1.33        | 0.2436   | 1.66        | 0.5798    | 1.25        |
| Asparagine               | 236            | GCTOF  | BinBase  | 2822±571                                 | 809±46                                    | 3118±3589                                 | 0.0000   | 0.29        | 0.8603   | 1.10        | 0.1456    | 3.85        |
| aspartic acid            | 5960           | GCTOF  | BinBase  | 85607±12531                              | 30781±8726                                | 24100±14152                               | 0.0000   | 0.36        | 0.0001   | 0.28        | 0.3608    | 0.78        |
| benzoic acid             | 243            | GCTOF  | BinBase  | 5073±2304                                | 5310±3304                                 | 5843±4168                                 | 0.8955   | 1.05        | 0.7270   | 1.15        | 0.8180    | 1.10        |
| beta-alanine             | 239            | GCTOF  | BinBase  | 12104±4290                               | 5912±571                                  | 4928±1660                                 | 0.0064   | 0.49        | 0.0082   | 0.41        | 0.2035    | 0.83        |
| beta-glycerolphosphate   | 2526           | GCTOF  | BinBase  | 236±170                                  | 156±40                                    | 267±101                                   | 0.2888   | 0.66        | 0.7306   | 1.13        | 0.0341    | 1.72        |
| capric acid              | 2969           | GCTOF  | BinBase  | 1759±1127                                | 1682±1307                                 | 2550±2106                                 | 0.9203   | 0.96        | 0.4804   | 1.45        | 0.4238    | 1.52        |
| Cellobiotol              | 160514         | GCTOF  | BinBase  | 812±229                                  | 654±352                                   | 1125±756                                  | 0.4128   | 0.81        | 0.4011   | 1.39        | 0.2041    | 1.72        |
| Cholesterol              | 5997           | GCTOF  | BinBase  | 218461±155566                            | 157675±36525                              | 216091±39259                              | 0.3736   | 0.72        | 0.9745   | 0.99        | 0.0310    | 1.37        |
| citric acid              | 311            | GCTOF  | BinBase  | 13695±5069                               | 11073±647                                 | 12708±6331                                | 0.2364   | 0.81        | 0.7924   | 0.93        | 0.5408    | 1.15        |
| conduitrol-beta-epoxide  | 119054         | GCTOF  | BinBase  | 4336±886                                 | 2869±507                                  | 3120±2009                                 | 0.0072   | 0.66        | 0.2509   | 0.72        | 0.7725    | 1.09        |
| Creatinine               | 588            | GCTOF  | BinBase  | 14282±14341                              | 11605±10574                               | 16638±20296                               | 0.7294   | 0.81        | 0.8374   | 1.16        | 0.6084    | 1.43        |
| Cysteine                 | 594            | GCTOF  | BinBase  | 2645±493                                 | 646±352                                   | 636±517                                   | 0.0000   | 0.24        | 0.0002   | 0.24        | 0.9727    | 0.99        |
| cytidine-5'-diphosphate  | 290            | GCTOF  | BinBase  | 363±183                                  | 821±761                                   | 515±438                                   | 0.2250   | 2.26        | 0.4935   | 1.42        | 0.4492    | 0.63        |
| dehydroabiatic acid      | 94391          | GCTOF  | BinBase  | 1428±877                                 | 1465±1190                                 | 2231±1900                                 | 0.9550   | 1.03        | 0.4158   | 1.56        | 0.4345    | 1.52        |
| Dodecane                 | 8182           | GCTOF  | BinBase  | 458±191                                  | 494±45                                    | 571±286                                   | 0.6641   | 1.08        | 0.4831   | 1.25        | 0.5259    | 1.16        |
| Dodecanol                | 8193           | GCTOF  | BinBase  | 449±185                                  | 1441±2356                                 | 571±463                                   | 0.3767   | 3.21        | 0.5997   | 1.27        | 0.4414    | 0.40        |
| elaidic acid             | 5282749        | GCTOF  | BinBase  | 407±52                                   | 291±144                                   | 522±377                                   | 0.1244   | 0.72        | 0.5201   | 1.28        | 0.1976    | 1.79        |
| Erythritol               | 222285         | GCTOF  | BinBase  | 1474±222                                 | 436±136                                   | 631±202                                   | 0.0000   | 0.30        | 0.0002   | 0.43        | 0.0881    | 1.45        |
| Fructose                 | 107428         | GCTOF  | BinBase  | 164±97                                   | 158±71                                    | 254±191                                   | 0.9036   | 0.96        | 0.3755   | 1.55        | 0.2791    | 1.61        |
| fructose 1 phosphate     | 65246          | GCTOF  | BinBase  | 217±49                                   | 566±161                                   | 528±180                                   | 0.0012   | 2.60        | 0.0059   | 2.43        | 0.7257    | 0.93        |
| fructose-6-phosphate     | 69507          | GCTOF  | BinBase  | 915±471                                  | 494±260                                   | 721±528                                   | 0.0920   | 0.54        | 0.5563   | 0.79        | 0.3753    | 1.46        |
| fumaric acid             | 444972         | GCTOF  | BinBase  | 2391±285                                 | 2080±255                                  | 2181±470                                  | 0.0881   | 0.87        | 0.4161   | 0.91        | 0.6615    | 1.05        |
| GABA                     | 119            | GCTOF  | BinBase  | 27455±8697                               | 14469±7559                                | 16300±5398                                | 0.0264   | 0.53        | 0.0408   | 0.59        | 0.6619    | 1.13        |
| galactose-6-phosphate    | 99058          | GCTOF  | BinBase  | 353±247                                  | 231±98                                    | 168±23                                    | 0.2943   | 0.66        | 0.1349   | 0.48        | 0.1965    | 0.73        |
| Glucose                  | 5793           | GCTOF  | BinBase  | 1043±314                                 | 2336±1563                                 | 2201±1327                                 | 0.1048   | 2.24        | 0.0942   | 2.11        | 0.8821    | 0.94        |
| glucose-1-phosphate      | 65533          | GCTOF  | BinBase  | 1985±1950                                | 2645±1838                                 | 1224±1278                                 | 0.5784   | 1.33        | 0.4862   | 0.62        | 0.1799    | 0.46        |
| glucose-6-phosphate      | 5958           | GCTOF  | BinBase  | 587±380                                  | 241±112                                   | 319±243                                   | 0.0608   | 0.41        | 0.2210   | 0.54        | 0.4980    | 1.32        |
| glutamic acid            | 33032          | GCTOF  | BinBase  | 87873±78030                              | 36122±29399                               | 54034±54938                               | 0.1643   | 0.41        | 0.4507   | 0.61        | 0.5057    | 1.50        |
| Glutamine                | 5961           | GCTOF  | BinBase  | 14153±12335                              | 1233±354                                  | 2767±1496                                 | 0.0291   | 0.09        | 0.0746   | 0.20        | 0.0365    | 2.24        |
| Glutathione              | 124886         | GCTOF  | BinBase  | 1129±869                                 | 258±121                                   | 362±265                                   | 0.0367   | 0.23        | 0.0960   | 0.32        | 0.4087    | 1.40        |
| glyceric acid            | 439194         | GCTOF  | BinBase  | 611±224                                  | 601±339                                   | 850±647                                   | 0.9570   | 0.98        | 0.4575   | 1.39        | 0.4324    | 1.41        |
| glycerol-alpha-phosphate | 754            | GCTOF  | BinBase  | 15820±8266                               | 8536±3528                                 | 16354±7966                                | 0.0803   | 0.54        | 0.9197   | 1.03        | 0.0573    | 1.92        |

|                          |          |       |         |               |              |               |        |      |        |      |        |      |
|--------------------------|----------|-------|---------|---------------|--------------|---------------|--------|------|--------|------|--------|------|
| Glycine                  | 750      | GCTOF | BinBase | 649509±49332  | 105702±26666 | 132745±91896  | 0.0000 | 0.16 | 0.0000 | 0.20 | 0.5055 | 1.26 |
| glycolic acid            | 757      | GCTOF | BinBase | 1056±163      | 1191±484     | 1644±788      | 0.5663 | 1.13 | 0.1407 | 1.56 | 0.2709 | 1.38 |
| Guanosine                | 6802     | GCTOF | BinBase | 128±26        | 453±372      | 356±290       | 0.0853 | 3.55 | 0.1172 | 2.79 | 0.6482 | 0.79 |
| hexuronic acid           | 19770757 | GCTOF | BinBase | 963±135       | 857±46       | 619±372       | 0.1038 | 0.89 | 0.0880 | 0.64 | 0.1502 | 0.72 |
| Hydroxylamine            | 787      | GCTOF | BinBase | 6668±917      | 7352±1323    | 8498±4782     | 0.3559 | 1.10 | 0.4251 | 1.27 | 0.5844 | 1.16 |
| idonic acid              | 193325   | GCTOF | BinBase | 386±121       | 261±60       | 290±61        | 0.0515 | 0.68 | 0.1527 | 0.75 | 0.4374 | 1.11 |
| inosine 5'-monophosphate | 8582     | GCTOF | BinBase | 423±239       | 149±40       | 198±118       | 0.0207 | 0.35 | 0.0950 | 0.47 | 0.3593 | 1.33 |
| Inositol                 | 892      | GCTOF | BinBase | 151639±57783  | 113939±31668 | 115822±95962  | 0.2015 | 0.75 | 0.4950 | 0.76 | 0.9646 | 1.02 |
| inositol-4-monophosphate | 440043   | GCTOF | BinBase | 409±162       | 422±43       | 545±181       | 0.8558 | 1.03 | 0.2454 | 1.33 | 0.1369 | 1.29 |
| Inulobiose               | 439552   | GCTOF | BinBase | 6993±8844     | 5413±5225    | 8684±10418    | 0.7206 | 0.77 | 0.7889 | 1.24 | 0.5146 | 1.60 |
| Isoleucine               | 6306     | GCTOF | BinBase | 25573±4980    | 7856±1248    | 12447±2847    | 0.0000 | 0.31 | 0.0009 | 0.49 | 0.0059 | 1.58 |
| lactic acid              | 612      | GCTOF | BinBase | 10729±9797    | 11157±6900   | 11443±10471   | 0.9341 | 1.04 | 0.9141 | 1.07 | 0.9577 | 1.03 |
| lauric acid              | 3893     | GCTOF | BinBase | 19465±16335   | 16963±16378  | 30809±28148   | 0.8063 | 0.87 | 0.4582 | 1.58 | 0.3338 | 1.82 |
| Leucine                  | 6106     | GCTOF | BinBase | 14434±15000   | 9218±1162    | 7130±6331     | 0.4130 | 0.64 | 0.3452 | 0.49 | 0.4442 | 0.77 |
| Levoglycosan             | 2724705  | GCTOF | BinBase | 492±117       | 383±98       | 396±107       | 0.1251 | 0.78 | 0.2098 | 0.80 | 0.8390 | 1.03 |
| Lysine                   | 5962     | GCTOF | BinBase | 4925±2687     | 1735±716     | 2504±929      | 0.0201 | 0.35 | 0.0933 | 0.51 | 0.1547 | 1.44 |
| malic acid               | 222656   | GCTOF | BinBase | 4534±2518     | 5496±721     | 4549±1179     | 0.3907 | 1.21 | 0.9905 | 1.00 | 0.1348 | 0.83 |
| Mannitol                 | 6251     | GCTOF | BinBase | 875±665       | 3008±2401    | 4342±2333     | 0.0883 | 3.44 | 0.0127 | 4.96 | 0.3771 | 1.44 |
| methanolphosphate        | 13130    | GCTOF | BinBase | 1267±1193     | 1173±801     | 1050±494      | 0.8799 | 0.93 | 0.7164 | 0.83 | 0.7711 | 0.89 |
| Methionine               | 6137     | GCTOF | BinBase | 3596±508      | 1029±292     | 1227±316      | 0.0000 | 0.29 | 0.0000 | 0.34 | 0.3084 | 1.19 |
| methylhexadecanoic acid  | 10465    | GCTOF | BinBase | 1733±494      | 1687±586     | 2352±1133     | 0.8927 | 0.97 | 0.2955 | 1.36 | 0.2401 | 1.39 |
| monopalmitin-1-glyceride | 14900    | GCTOF | BinBase | 280±61        | 232±61       | 278±137       | 0.2304 | 0.83 | 0.9837 | 0.99 | 0.4724 | 1.20 |
| myristic acid            | 11005    | GCTOF | BinBase | 959±858       | 1710±837     | 1117±1401     | 0.1770 | 1.78 | 0.8345 | 1.17 | 0.4063 | 0.65 |
| N-acetyl-D-mannosamine   | 65150    | GCTOF | BinBase | 212±41        | 206±74       | 272±154       | 0.8842 | 0.97 | 0.4181 | 1.29 | 0.3708 | 1.32 |
| Octadecanol              | 8221     | GCTOF | BinBase | 864±606       | 665±168      | 795±440       | 0.4557 | 0.77 | 0.8411 | 0.92 | 0.5176 | 1.20 |
| oleic acid               | 445639   | GCTOF | BinBase | 1166±214      | 880±539      | 1394±1017     | 0.2969 | 0.75 | 0.6381 | 1.19 | 0.3102 | 1.58 |
| Ornithine                | 6262     | GCTOF | BinBase | 6873±5318     | 1626±158     | 1989±450      | 0.0372 | 0.24 | 0.0749 | 0.29 | 0.0959 | 1.22 |
| Oxoproline               | 7405     | GCTOF | BinBase | 827014±550035 | 160555±78198 | 219556±80361  | 0.0158 | 0.19 | 0.0403 | 0.27 | 0.2496 | 1.37 |
| palmitic acid            | 985      | GCTOF | BinBase | 8543±561      | 8676±2346    | 12047±6610    | 0.9050 | 1.02 | 0.2715 | 1.41 | 0.2705 | 1.39 |
| palmitoleic acid         | 445638   | GCTOF | BinBase | 1722±1097     | 1357±701     | 1403±387      | 0.5197 | 0.79 | 0.5570 | 0.81 | 0.8994 | 1.03 |
| pantothenic acid         | 6613     | GCTOF | BinBase | 2048±679      | 787±150      | 899±440       | 0.0016 | 0.38 | 0.0131 | 0.44 | 0.5705 | 1.14 |
| pelargonic acid          | 8158     | GCTOF | BinBase | 19401±18271   | 15875±15647  | 20025±14962   | 0.7378 | 0.82 | 0.9544 | 1.03 | 0.6658 | 1.26 |
| Phenylalanine            | 6140     | GCTOF | BinBase | 11395±3813    | 3359±466     | 4582±1135     | 0.0006 | 0.29 | 0.0050 | 0.40 | 0.0381 | 1.36 |
| Phosphate                | 1004     | GCTOF | BinBase | 177637±153036 | 200431±93979 | 319440±205201 | 0.7679 | 1.13 | 0.2506 | 1.80 | 0.2330 | 1.59 |
| phosphoethanolamine      | 1015     | GCTOF | BinBase | 7216±4396     | 15326±4445   | 19577±7288    | 0.0143 | 2.12 | 0.0117 | 2.71 | 0.2631 | 1.28 |
| phosphoric acid          | 1004     | GCTOF | BinBase | 151376±151576 | 278622±64205 | 324620±308426 | 0.0929 | 1.84 | 0.2923 | 2.14 | 0.7273 | 1.17 |
| phthalic acid            | 1017     | GCTOF | BinBase | 2896±257      | 3225±1554    | 3900±2375     | 0.6535 | 1.11 | 0.3746 | 1.35 | 0.5835 | 1.21 |
| p-hydroquinone           | 785      | GCTOF | BinBase | 595±299       | 588±415      | 966±842       | 0.9746 | 0.99 | 0.3810 | 1.62 | 0.3558 | 1.64 |
| Proline                  | 145742   | GCTOF | BinBase | 70985±10802   | 11055±1366   | 13025±4927    | 0.0000 | 0.16 | 0.0000 | 0.18 | 0.3687 | 1.18 |
| propane-1,3-diol         | 10442    | GCTOF | BinBase | 16609±21707   | 15552±16420  | 9382±11328    | 0.9286 | 0.94 | 0.5278 | 0.56 | 0.4965 | 0.60 |
| Putrescine               | 1045     | GCTOF | BinBase | 23229±15022   | 7341±937     | 10687±2679    | 0.0281 | 0.32 | 0.1034 | 0.46 | 0.0181 | 1.46 |
| pyrazine 2,5-dihydroxy   | 15532987 | GCTOF | BinBase | 2969±3518     | 1895±1840    | 2760±3334     | 0.5302 | 0.64 | 0.9256 | 0.93 | 0.5976 | 1.46 |
| pyrophosphate 1          | 1023     | GCTOF | BinBase | 313041±78693  | 105550±84258 | 170882±171869 | 0.0024 | 0.34 | 0.1311 | 0.55 | 0.4303 | 1.62 |

|                        |          |           |               |                |                |                |        |      |        |      |        |      |
|------------------------|----------|-----------|---------------|----------------|----------------|----------------|--------|------|--------|------|--------|------|
| pyruvic acid           | 1060     | GCTOF     | BinBase       | 2038±494       | 1330±494       | 1891±789       | 0.0420 | 0.65 | 0.7317 | 0.93 | 0.1833 | 1.42 |
| Ribitol                | 827      | GCTOF     | BinBase       | 1296±393       | 663±169        | 1007±601       | 0.0058 | 0.51 | 0.3944 | 0.78 | 0.2094 | 1.52 |
| Ribose                 | 5779     | GCTOF     | BinBase       | 257±58         | 1631±1629      | 642±503        | 0.0947 | 6.34 | 0.1276 | 2.50 | 0.2273 | 0.39 |
| ribose-5-phosphate     | 77982    | GCTOF     | BinBase       | 836±621        | 641±252        | 575±273        | 0.4969 | 0.77 | 0.4154 | 0.69 | 0.6884 | 0.90 |
| ribulose-5-phosphate   | 439184   | GCTOF     | BinBase       | 405±138        | 339±157        | 433±324        | 0.4797 | 0.84 | 0.8637 | 1.07 | 0.5421 | 1.28 |
| Serine                 | 5951     | GCTOF     | BinBase       | 32411±3346     | 9666±1763      | 19694±5431     | 0.0000 | 0.30 | 0.0021 | 0.61 | 0.0020 | 2.04 |
| Sorbitol               | 5780     | GCTOF     | BinBase       | 3997±3061      | 17624±20203    | 10515±7478     | 0.1728 | 4.41 | 0.1089 | 2.63 | 0.4781 | 0.60 |
| Spermidine             | 1102     | GCTOF     | BinBase       | 5208±1578      | 7118±3326      | 10942±7173     | 0.2714 | 1.37 | 0.1190 | 2.10 | 0.2711 | 1.54 |
| stearic acid           | 5281     | GCTOF     | BinBase       | 88086±7341     | 91400±32271    | 126872±72093   | 0.8285 | 1.04 | 0.2656 | 1.44 | 0.3040 | 1.39 |
| succinic acid          | 1110     | GCTOF     | BinBase       | 1689±701       | 995±179        | 1044±98        | 0.0427 | 0.59 | 0.0758 | 0.62 | 0.6023 | 1.05 |
| Sucrose                | 5988     | GCTOF     | BinBase       | 138±62         | 531±952        | 150±63         | 0.3860 | 3.83 | 0.7793 | 1.08 | 0.3995 | 0.28 |
| Taurine                | 1123     | GCTOF     | BinBase       | 2916±1211      | 924±721        | 1818±2196      | 0.0080 | 0.32 | 0.3563 | 0.62 | 0.3689 | 1.97 |
| Threitol               | 169019   | GCTOF     | BinBase       | 233±42         | 145±21         | 157±44         | 0.0014 | 0.62 | 0.0231 | 0.67 | 0.5611 | 1.08 |
| threonic acid          | 439535   | GCTOF     | BinBase       | 241±91         | 150±45         | 210±97         | 0.0586 | 0.62 | 0.6156 | 0.87 | 0.2119 | 1.40 |
| Threonine              | 6288     | GCTOF     | BinBase       | 64497±7352     | 9297±1414      | 18413±7383     | 0.0000 | 0.14 | 0.0000 | 0.29 | 0.0152 | 1.98 |
| trans-4-hydroxyproline | 5810     | GCTOF     | BinBase       | 1295±292       | 426±67         | 725±255        | 0.0001 | 0.33 | 0.0111 | 0.56 | 0.0208 | 1.70 |
| Triethanolamine        | 7618     | GCTOF     | BinBase       | 402±252        | 460±419        | 759±608        | 0.7921 | 1.15 | 0.2598 | 1.89 | 0.3603 | 1.65 |
| Tryptophan             | 6305     | GCTOF     | BinBase       | 5299±2798      | 1985±283       | 2547±584       | 0.0171 | 0.37 | 0.0635 | 0.48 | 0.0654 | 1.28 |
| Tyrosine               | 6057     | GCTOF     | BinBase       | 23171±7321     | 6994±525       | 10528±2311     | 0.0004 | 0.30 | 0.0062 | 0.45 | 0.0051 | 1.51 |
| UDP GlcNAc             | 445675   | GCTOF     | BinBase       | 2768±342       | 1161±81        | 1978±438       | 0.0000 | 0.42 | 0.0130 | 0.71 | 0.0014 | 1.70 |
| UDP-glucuronic acid    | 17473    | GCTOF     | BinBase       | 4558±2786      | 2252±1229      | 3159±2503      | 0.0991 | 0.49 | 0.4276 | 0.69 | 0.4520 | 1.40 |
| Uracil                 | 1174     | GCTOF     | BinBase       | 1235±288       | 8301±7272      | 6406±5068      | 0.0599 | 6.72 | 0.0523 | 5.19 | 0.6358 | 0.77 |
| Urea                   | 1176     | GCTOF     | BinBase       | 1413±1507      | 1254±1742      | 2174±2266      | 0.8759 | 0.89 | 0.5495 | 1.54 | 0.4650 | 1.73 |
| Valine                 | 6287     | GCTOF     | BinBase       | 31162±13918    | 9732±1053      | 14623±3288     | 0.0042 | 0.31 | 0.0323 | 0.47 | 0.0071 | 1.50 |
| Xanthine               | 1188     | GCTOF     | BinBase       | 141±18         | 233±62         | 265±156        | 0.0110 | 1.65 | 0.1135 | 1.89 | 0.6491 | 1.14 |
| Xylitol                | 6912     | GCTOF     | BinBase       | 1359±478       | 1486±797       | 1329±742       | 0.7640 | 1.09 | 0.9412 | 0.98 | 0.7460 | 0.89 |
| lysoPC 14:0            | 460604   | HILIC Pos | LipidBlastPos | 5353±1205      | 2579±1179      | 4942±1963      | 0.0024 | 0.48 | 0.6714 | 0.92 | 0.0299 | 1.92 |
| lysoPC 16:0            | 460602   | HILIC Pos | LipidBlastPos | 169080±31167   | 77996±17303    | 152239±11477   | 0.0001 | 0.46 | 0.2426 | 0.90 | 0.0000 | 1.95 |
| lysoPC 16:1            | 24779461 | HILIC Pos | LipidBlastPos | 14569±1853     | 7186±5291      | 11259±7217     | 0.0091 | 0.49 | 0.3021 | 0.77 | 0.2909 | 1.57 |
| lysoPC 18:0            | 497299   | HILIC Pos | LipidBlastPos | 153797±29090   | 103673±8418    | 196096±34611   | 0.0023 | 0.67 | 0.0449 | 1.28 | 0.0001 | 1.89 |
| lysoPC 18:1            | 16081932 | HILIC Pos | LipidBlastPos | 103353±27458   | 38078±24885    | 60520±30134    | 0.0015 | 0.37 | 0.0277 | 0.59 | 0.1898 | 1.59 |
| lysoPE 18:1            | 9547071  | HILIC Pos | LipidBlastPos | 16766±6949     | 3942±2167      | 3540±961       | 0.0015 | 0.24 | 0.0010 | 0.21 | 0.6870 | 0.90 |
| PC 30:0                | 24778679 | HILIC Pos | LipidBlastPos | 834905±207960  | 585790±160464  | 905219±182321  | 0.0425 | 0.70 | 0.5474 | 1.08 | 0.0092 | 1.55 |
| PC 32:0                | 452110   | HILIC Pos | LipidBlastPos | 729113±235729  | 1018269±364907 | 1238916±244640 | 0.1341 | 1.40 | 0.0043 | 1.70 | 0.2468 | 1.22 |
| PC 32:1                | 52922440 | HILIC Pos | LipidBlastPos | 1097793±405733 | 925087±159929  | 1024956±337771 | 0.3549 | 0.84 | 0.7424 | 0.93 | 0.5275 | 1.11 |
| PC 32:2                | 24778764 | HILIC Pos | LipidBlastPos | 104357±46329   | 79311±21189    | 89445±33837    | 0.2562 | 0.76 | 0.5386 | 0.86 | 0.5480 | 1.13 |
| PC 34:1                | 24778933 | HILIC Pos | LipidBlastPos | 2107851±266838 | 1861708±281072 | 1757321±381403 | 0.1508 | 0.88 | 0.0949 | 0.83 | 0.6012 | 0.94 |
| PC 34:2                | 24778935 | HILIC Pos | LipidBlastPos | 903864±133722  | 680782±132597  | 652131±185970  | 0.0158 | 0.75 | 0.0226 | 0.72 | 0.7649 | 0.96 |
| PC 36:2                | 10350317 | HILIC Pos | LipidBlastPos | 1711074±224685 | 1327366±171296 | 1161596±204974 | 0.0077 | 0.78 | 0.0013 | 0.68 | 0.1595 | 0.88 |
| PC 36:3                | 52922727 | HILIC Pos | LipidBlastPos | 312557±63314   | 376365±53278   | 477463±114202  | 0.0882 | 1.20 | 0.0114 | 1.53 | 0.0778 | 1.27 |
| PC 36:4                | 24779073 | HILIC Pos | LipidBlastPos | 421529±66275   | 704331±62613   | 991412±110446  | 0.0000 | 1.67 | 0.0000 | 2.35 | 0.0002 | 1.41 |
| PC 38:2                | 52923113 | HILIC Pos | LipidBlastPos | 113786±14611   | 114670±38607   | 85323±28810    | 0.9592 | 1.01 | 0.0563 | 0.75 | 0.1665 | 0.74 |
| PC 38:3                | 52923231 | HILIC Pos | LipidBlastPos | 93578±32176    | 194655±34841   | 228616±61801   | 0.0004 | 2.08 | 0.0008 | 2.44 | 0.2682 | 1.17 |
| PC 38:4                | 52923291 | HILIC Pos | LipidBlastPos | 226511±46431   | 718700±31112   | 927458±76090   | 0.0000 | 3.17 | 0.0000 | 4.09 | 0.0001 | 1.29 |
| PC 38:5                | 52923293 | HILIC Pos | LipidBlastPos | 346695±102732  | 504700±37155   | 700345±46931   | 0.0053 | 1.46 | 0.0000 | 2.02 | 0.0000 | 1.39 |

|                        |          |           |               |               |               |               |        |      |        |      |        |      |
|------------------------|----------|-----------|---------------|---------------|---------------|---------------|--------|------|--------|------|--------|------|
| PC 38:6                | 24779131 | HILIC Pos | LipidBlastPos | 128578±69819  | 188054±27705  | 260412±43051  | 0.0811 | 1.46 | 0.0028 | 2.03 | 0.0061 | 1.38 |
| PC 40:7                | 52923693 | HILIC Pos | LipidBlastPos | 109956±34783  | 186453±18969  | 210213±9659   | 0.0008 | 1.70 | 0.0000 | 1.91 | 0.0210 | 1.13 |
| PE 32:1                | 52924223 | HILIC Pos | LipidBlastPos | 33499±9812    | 23845±7145    | 19251±4833    | 0.0800 | 0.71 | 0.0096 | 0.57 | 0.2212 | 0.81 |
| PE 34:1                | 9546802  | HILIC Pos | LipidBlastPos | 154870±35801  | 147803±28337  | 93463±22277   | 0.7125 | 0.95 | 0.0051 | 0.60 | 0.0042 | 0.63 |
| PE 34:2                | 52924899 | HILIC Pos | LipidBlastPos | 96388±16357   | 60895±22764   | 42069±12180   | 0.0112 | 0.63 | 0.0001 | 0.44 | 0.1044 | 0.69 |
| PE 36:2                | 9546757  | HILIC Pos | LipidBlastPos | 367443±90106  | 287917±63334  | 152970±37349  | 0.1074 | 0.78 | 0.0003 | 0.42 | 0.0012 | 0.53 |
| PE 36:3                | 52924364 | HILIC Pos | LipidBlastPos | 61078±13278   | 42427±11671   | 40279±12193   | 0.0349 | 0.69 | 0.0241 | 0.66 | 0.7616 | 0.95 |
| PE 36:4                | 52924875 | HILIC Pos | LipidBlastPos | 84357±34846   | 82756±15387   | 104652±26984  | 0.9200 | 0.98 | 0.2857 | 1.24 | 0.1149 | 1.26 |
| PE 38:4                | 52924644 | HILIC Pos | LipidBlastPos | 217461±62464  | 303210±19925  | 364570±49287  | 0.0094 | 1.39 | 0.0011 | 1.68 | 0.0179 | 1.20 |
| PE 38:5                | 52924645 | HILIC Pos | LipidBlastPos | 168743±35887  | 150943±23408  | 167691±34871  | 0.3328 | 0.89 | 0.9599 | 0.99 | 0.3517 | 1.11 |
| PE 38:6                | 52924862 | HILIC Pos | LipidBlastPos | 53276±21503   | 69057±14108   | 79311±21551   | 0.1637 | 1.30 | 0.0626 | 1.49 | 0.3525 | 1.15 |
| PE 40:7                | 52924844 | HILIC Pos | LipidBlastPos | 74673±17831   | 82156±2066    | 77373±4850    | 0.3312 | 1.10 | 0.7279 | 1.04 | 0.0505 | 0.94 |
| plasmeyl-PC 34:1       | 24779384 | HILIC Pos | LipidBlastPos | 56320±1398    | 35464±2466    | 37972±6400    | 0.0011 | 0.63 | 0.0138 | 0.67 | 0.6566 | 1.07 |
| plasmeyl-PC 36:4       | 24779388 | HILIC Pos | LipidBlastPos | 22757±11370   | 130015±16964  | 199522±31453  | 0.0000 | 5.71 | 0.0000 | 8.77 | 0.0008 | 1.53 |
| plasmeyl-PE 34:1       | 52925128 | HILIC Pos | LipidBlastPos | 128478±45980  | 65709±11252   | 52534±10137   | 0.0087 | 0.51 | 0.0027 | 0.41 | 0.0589 | 0.80 |
| plasmeyl-PE 34:2       | 52925127 | HILIC Pos | LipidBlastPos | 52326±9051    | 20318±5929    | 20477±5153    | 0.0000 | 0.39 | 0.0000 | 0.39 | 0.9614 | 1.01 |
| plasmeyl-PE 36:2       | 52925059 | HILIC Pos | LipidBlastPos | 121275±48879  | 51985±12384   | 39172±7206    | 0.0072 | 0.43 | 0.0022 | 0.32 | 0.0533 | 0.75 |
| plasmeyl-PE 36:4       | 52925126 | HILIC Pos | LipidBlastPos | 216509±72775  | 353851±32283  | 408149±45979  | 0.0018 | 1.63 | 0.0003 | 1.89 | 0.0395 | 1.15 |
| plasmeyl-PE 38:4       | 9547058  | HILIC Pos | LipidBlastPos | 136871±29801  | 179484±27360  | 198979±23960  | 0.0274 | 1.31 | 0.0026 | 1.45 | 0.2185 | 1.11 |
| plasmeyl-PE 38:6       | 5283497  | HILIC Pos | LipidBlastPos | 116339±51341  | 147347±38833  | 173049±46728  | 0.2653 | 1.27 | 0.0733 | 1.49 | 0.3245 | 1.17 |
| plasmeyl-PE 40:6       | 42607458 | HILIC Pos | LipidBlastPos | 96628±29545   | 100047±27106  | 118224±32115  | 0.8388 | 1.04 | 0.2533 | 1.22 | 0.3143 | 1.18 |
| SM 32:1                | 11433862 | HILIC Pos | LipidBlastPos | 30414±5287    | 25244±3821    | 36860±6299    | 0.0809 | 0.83 | 0.0838 | 1.21 | 0.0031 | 1.46 |
| SM 34:1                | 9939941  | HILIC Pos | LipidBlastPos | 766916±538287 | 807358±370629 | 964904±407867 | 0.8825 | 1.05 | 0.4891 | 1.26 | 0.4997 | 1.20 |
| SM 34:2                | 52931143 | HILIC Pos | LipidBlastPos | 95114±14177   | 74480±10630   | 116910±23727  | 0.0172 | 0.78 | 0.0822 | 1.23 | 0.0025 | 1.57 |
| SM 36:2                | 6443882  | HILIC Pos | LipidBlastPos | 17477±4301    | 14947±1358    | 16803±3104    | 0.1993 | 0.86 | 0.7619 | 0.96 | 0.2092 | 1.12 |
| Acetylcarnitine        | 7045767  | HILIC Pos | Metlin        | 41161±27733   | 19204±7620    | 32543±29444   | 0.0910 | 0.47 | 0.6132 | 0.79 | 0.3079 | 1.69 |
| Betaine                | 247      | HILIC Pos | Metlin        | 69668±49909   | 101659±53369  | 57760±53309   | 0.3087 | 1.46 | 0.6980 | 0.83 | 0.1845 | 0.57 |
| Butyryl carnitine      | 213144   | HILIC Pos | Metlin        | 6675±1180     | 2576±702      | 5295±3400     | 0.0000 | 0.39 | 0.3698 | 0.79 | 0.0840 | 2.06 |
| Carnitine              | 10917    | HILIC Pos | Metlin        | 49880±39128   | 32988±19821   | 50112±46303   | 0.3677 | 0.66 | 0.9927 | 1.00 | 0.4244 | 1.52 |
| Creatine               | 586      | HILIC Pos | Metlin        | 165161±149386 | 256790±236298 | 442640±462043 | 0.4407 | 1.55 | 0.1919 | 2.68 | 0.4010 | 1.72 |
| Pantothenic Acid       | 6613     | HILIC Pos | Metlin        | 16266±2975    | 9255±1452     | 11782±7345    | 0.0004 | 0.57 | 0.1958 | 0.72 | 0.4277 | 1.27 |
| Sphingosine            | 5280335  | HILIC Pos | Metlin        | 37105±15123   | 28978±3820    | 40518±6732    | 0.2307 | 0.78 | 0.6244 | 1.09 | 0.0044 | 1.40 |
| Taurine                | 1123     | HILIC Pos | Metlin        | 324287±177289 | 278594±180009 | 356678±325883 | 0.6672 | 0.86 | 0.8349 | 1.10 | 0.6186 | 1.28 |
| Adenosine              | 60961    | HILIC Pos | NIST          | 3048±725      | 6457±5052     | 7208±1914     | 0.1333 | 2.12 | 0.0011 | 2.36 | 0.7886 | 1.12 |
| 5'-Methylthioadenosine | 439176   | RP Pos    | Metlin        | 27307±1598    | 18030±992     | 33961±4076    | 0.0000 | 0.66 | 0.0094 | 1.24 | 0.0000 | 1.88 |
| Pantothenic Acid       | 6613     | RP Pos    | Metlin        | 17423±1598    | 9608±992      | 13820±5780    | 0.0000 | 0.55 | 0.2128 | 0.79 | 0.1090 | 1.44 |
